# Supplementary material for: Transcriptomics of morphological color change in polychromatic Midas cichlids
Source: PubMed Central journal article supplement (PMC3623868; doi:10.1186/1471-2164-14-171), 2013-03-13
Supplement: 1471-2164-14-171-S1.pdf [file 1471-2164-14-171-S1.pdf]

**Table S1.** Assembly and mapping statistics. The table summarises the following for each sample in this study: the number of reads after demultiplexing (Raw reads); the number of reads after quality trimming, and the removal of parasite sequences (Retained reads); the reads that mapped uniquely (Uniquely mapped reads) and the reads that mapped to multiple contigs (All mapped reads) of the Midas and the Tilapia assemblies. The “All mapped reads” columns include the sum of the reads that were aligned uniquely to the assembly, and the reads that aligned to multiple locations. The retained reads were used to build the Midas *de novo* assembly. The “All mapped reads” column includes numbers smaller than those included in the “Retained reads” column because many contigs that were assembled *de novo* were excluded from the final assembly, for example: 1) contigs with low coverage; 2) contigs shorter than 200 bp; 3) contigs not annotated in the public databases (see Methods).

| Sample | Raw reads | Retained reads | Reads mapped to the Midas <i>de novo</i> assembly |                  | Reads mapped to the Tilapia assembly |                  |
|--------|-----------|----------------|---------------------------------------------------|------------------|--------------------------------------|------------------|
|        |           |                | Uniquely mapped reads                             | All mapped reads | Uniquely mapped reads                | All mapped reads |
| N1     | 14731178  | 10186475       | 4957424                                           | 8155301          | 4824276                              | 5075935          |
| N2     | 8910388   | 6408408        | 3134179                                           | 5144105          | 3072004                              | 3245589          |
| N3     | 18127548  | 12921426       | 6348632                                           | 10358334         | 6096722                              | 6425504          |
| N4     | 4446846   | 3269300        | 1585381                                           | 2601542          | 1534905                              | 1616389          |
| N5     | 16858908  | 12367532       | 5999178                                           | 9781499          | 5573564                              | 5904593          |
| N6     | 13560288  | 9307106        | 4425962                                           | 7340742          | 4383714                              | 4612665          |
| T1     | 5399066   | 3539753        | 1747549                                           | 2823523          | 1561462                              | 1661444          |
| T2     | 16452774  | 11467742       | 5658060                                           | 9126897          | 5122802                              | 5453016          |
| T3     | 14206104  | 10209248       | 5001796                                           | 8245928          | 4937639                              | 5196093          |
| T4     | 10892948  | 7998658        | 3877919                                           | 6426558          | 3972563                              | 4196976          |
| T5     | 22899996  | 16723324       | 8245630                                           | 13371343         | 7853762                              | 8323519          |
| T6     | 21940714  | 16587041       | 8211984                                           | 13133790         | 7052250                              | 7560589          |
| G1     | 13250492  | 9753629        | 4806616                                           | 7824678          | 4554184                              | 4812540          |
| G2     | 9656418   | 7239759        | 3509752                                           | 5827557          | 3482279                              | 3664884          |
| G3     | 27594624  | 19327124       | 9493984                                           | 15499999         | 9287923                              | 9847253          |
| G4     | 19996878  | 15387823       | 7560794                                           | 12300803         | 7087187                              | 7519806          |
| G7     | 18349754  | 13750022       | 6698080                                           | 10806913         | 6112306                              | 6491744          |
| G8     | 7127242   | 5009844        | 2417269                                           | 3959352          | 2331612                              | 2479916          |
| Total  | 264402166 | 191454214      | 93680189                                          | 152728864        | 88841154                             | 94088455         |
