# Supplementary material for: Transcriptomics of morphological color change in polychromatic Midas cichlids
Source: PubMed Central journal article supplement (PMC3623868; doi:10.1186/1471-2164-14-171), 2013-03-13

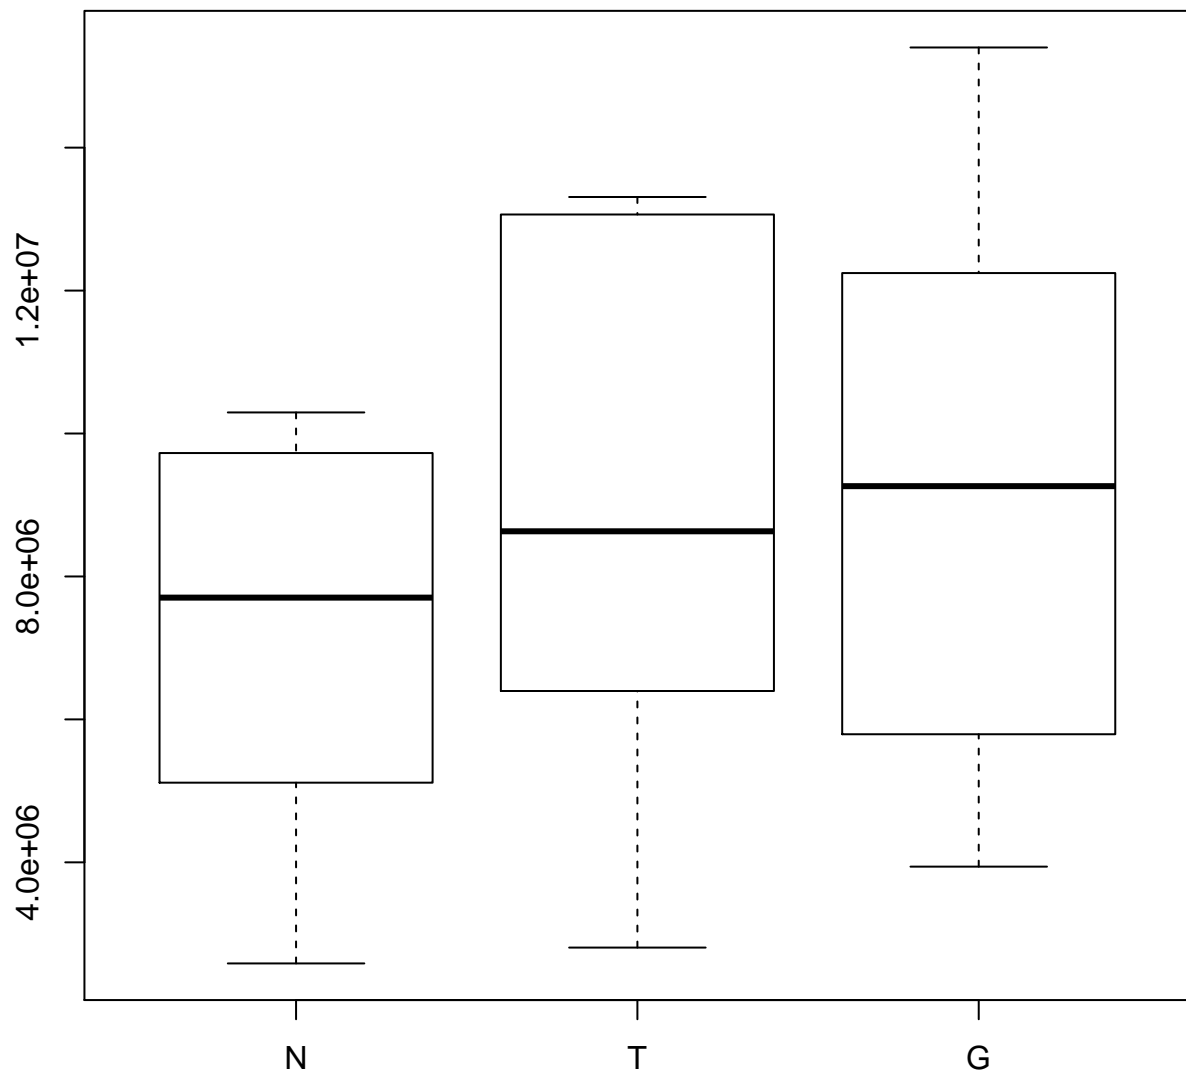

Supplement: 1471-2164-14-171-S2.pdf [file 1471-2164-14-171-S2.pdf]
